# Supplementary material for: Olfactomedin 2, a novel regulator for transforming growth factor-β–induced smooth muscle differentiation of human embryonic stem cell–derived mesenchymal cells
Source: PubMed Central journal article supplement — Mol Biol Cell. 2014 Dec 15;25(25):4106–14. doi: 10.1091/mbc.E14-08-1255 (PMC4263453; doi:10.1091/mbc.e14-08-1255), 2014-12-15
Supplement: supp_E14-08-1255v1_CombinedSupMats.pdf [file supp_E14-08-1255v1_CombinedSupMats.pdf]

# Supplemental Materials

*Molecular Biology of the Cell*

Shi et al.

## SUPPLEMENTAL MATERIALS

### Olfactomedin 2, a novel regulator for transforming growth factor- $\beta$ -induced smooth muscle differentiation of human embryonic stem cell-derived mesenchymal cells

Ning Shi, Xia Guo and Shi-You Chen

Department of Physiology & Pharmacology, University of Georgia, Athens, GA 30602

#### Supplemental Figure 1

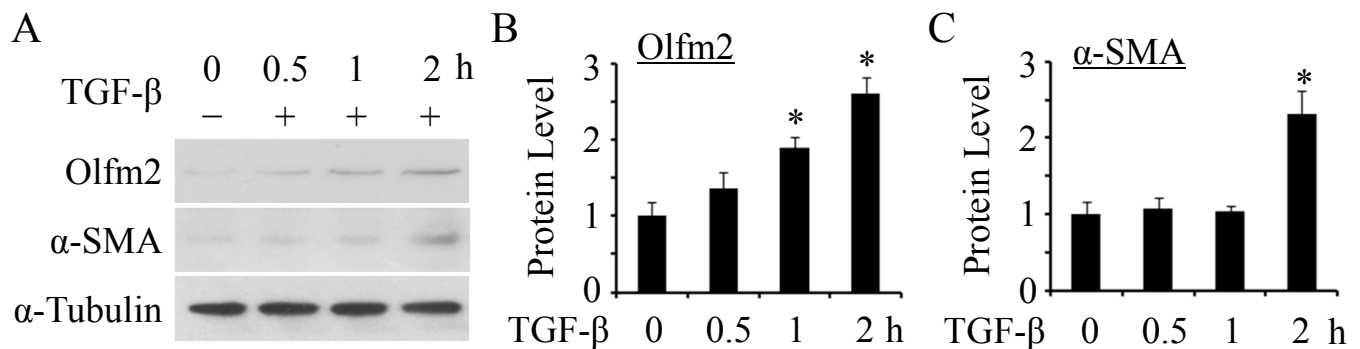

**Fig. S1: Olfm2 was induced earlier than  $\alpha$ -SMA.** hES-MCs were treated with TGF- $\beta$ 1 for 0.5, 1, or 2 h. Western blot (A) was performed to detect Olfm2 (A and B) and  $\alpha$ -SMA (A and C) protein expression as indicated and quantified by normalizing to  $\alpha$ -Tubulin (B and C). \*, p < 0.01 compared to vehicle-treated group (0 h) for Olfm2 (B) and  $\alpha$ -SMA (C), respectively. n=3.

## Supplemental Figure 2

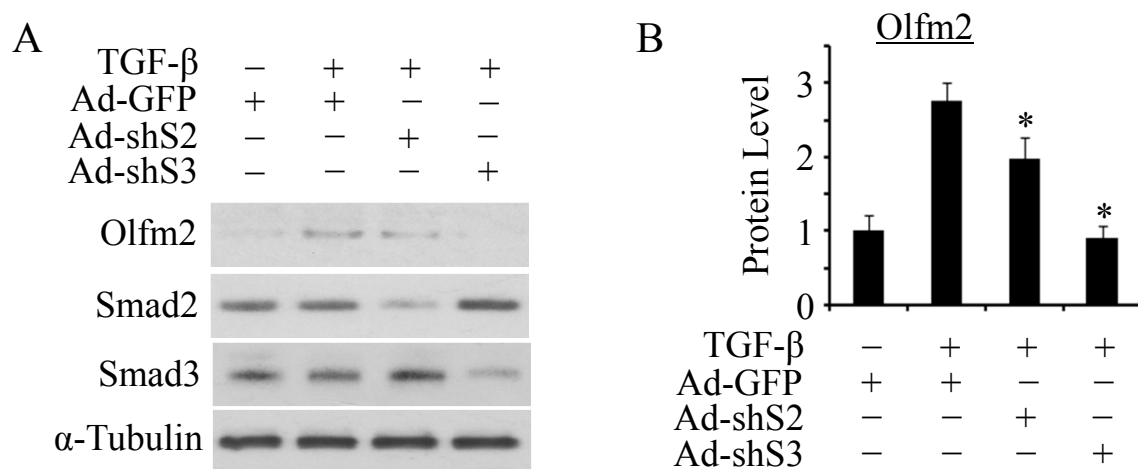

**Fig S2: Olfm2 expression was Smad2/3-dependent.** Smad2/3 expression in hES-MCs were knocked down by Smad2 (Ad-shS2) and Smad3 shRNA (Ad-shS3), respectively, followed by TGF- $\beta$ 1 (1 ng/ml) treatment for 24 h. Olfm2, Smad2 and Smad3 protein expression were detected by western blot (A) and quantified by normalizing to  $\alpha$ -Tubulin. Smad3 knockdown completely inhibited TGF- $\beta$ -induced Olfm2 expression, while Smad2 knockdown significantly reduced Olfm2 expression. \*,  $p < 0.01$  compared to control shRNA (Ad-GFP)-transduced group with TGF- $\beta$ 1 treatment (n=3).

## Supplemental Figure 3

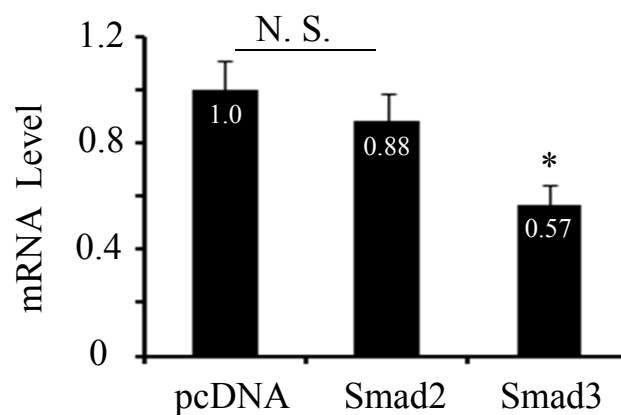

**Fig S3: Smad3, but not Smad2, inhibited Herp1 expression.** hES-MCs were transfected with control (pcDNA), Smad2, or Smad3 expression plasmid (3  $\mu$ g) in 6-well plates. qRT-PCR were performed to detect Herp1 expression. \*,  $p < 0.01$  compared to pcDNA group (n=3).
